# Supplementary material for: Inhibition of oxygen-mediated opportunistic bacteria overgrowth in the ileum alleviates excessive fatty acid absorption against a high-fat diet
Source: Research Square preprint supplement (doi:10.21203/rs.3.rs-7956394/v1), 2025-11-06
Supplement: Supplementary file 1 [file 0d755da75af055b7315b2665.docx]

**Extended Data Table 1. Dietary composition and energy density**

|  | Control (XTCON50J) |  | HFD (XTHF60) |  |
| --- | --- | --- | --- | --- |
| Ingredient | gm | kcal | gm | kcal |
| Casein | 200 | 800 | 200 | 800 |
| L-Cystine | 3 | 12 | 3 | 12 |
| Corn Starch | 506.20 | 2024.8 | 0 | 0 |
| Maltodextrin | 125 | 500 | 125 | 500 |
| Sucrose | 72.8 | 291.2 | 72.8 | 291.2 |
| Cellulose | 50 | 0 | 50 | 0 |
| Soybean Oil | 25 | 225 | 25 | 225 |
| Lard | 20 | 180 | 245 | 2205 |
| Mineral Mix S10026B | 50 | 0 | 50 | 0 |
| Vitamin Mix V10001C | 1 | 4 | 1 | 4 |
| Choline Bitartrate | 2 | 0 | 2 | 0 |
| FD&C Blue Dye #1 | 0.01 | 0 | 0.05 | 0 |
| FD&C Yellow Dye #5 | 0.04 | 0 | / | / |
| Total | 1055.05 | 4037 | 773.85 | 4037.20 |

|  | gm % | kcal % | gm % | kcal % |
| --- | --- | --- | --- | --- |
| Protein | 19.20 | 20 | 26 | 20 |
| Carbohydrate | 67.30 | 70 | 26 | 20 |
| Fat | 4.3 | 10 | 35 | 60 |

**Extended Data Table 2. Primers used for quantitative real-time PCR.**

**MOUSE**

| Gene | Forward (F) primers | Reverse (R) primers |
| --- | --- | --- |
| *Srebp1c* | GCCGGCGCCATGGACGAGCTGG | CAGGAAGGCTTCCAGAGAGGAG |
| *Fasn* | GCTGCGGAAACTTCAGGAAAT | AGAGACGTGTCACTCCTGGACTT |
| *Scd1* | CCGGAGACCCCTTAGATCGA | TAGCCTGTAAAAGATTTCTGCAAACC |
| *Cpt1a* | GCCTTCCAGTTCACAGT | ACCTTCAGCGAGTAGCG |
| *Pparα* | CCTGGAAAGTCCCTTATCT | GCCCTTACAGCCTTCACAT |
| *Pparβ* | AGGAGAAAGAGGAAGTGGCC | GGGAGGAATTCTGGGAGAGG |
| *Pparγ* | ACCACTCGCATTCCTTTGAC | TGGGTCAGCTCTTGTGAATG |
| *Rxr* | CTCAATGGCGTCCTCAAGGTTCC | TGTCTCGGCAGGTGTAGGTCAG |
| *Cd36* | GCTGGATTAGTGGTTAGGAGTCA | GAGAGGCGGGCATAGTATCA |
| *Hmgcs2* | GCTGCCAACTGGATGGAG | GTCGTACGCGTTCTCCATGT |
| *Fatp4* | CGGTTCTGGGACGATTGTAT | AACCTGGTGCTGGTTTTCTG |
| *ApoA-I* | GTGGCTCTGGTCTTCCTGAC | ACGGTTGAACCCAGAGTGTC |
| *ApoA-IV* | ATGCCAAGGAGGCTGTAGAA | CAGTTTCCTGGGCTAGATGC |
| *Ffar1* | AATGCCTCCAATGTGGCTAG | AGTCCTCGTCACACATATTG |
| *Ffar2* | ACAGTGGAGGGGACCAAGAT | GGGGACTCTCTACTCGGTGA |
| *Ffar3* | TTGCTAAACCTGACCATTTCGG | GATAGGCCACGCTCAGAAAAC |
| *Ffar4* | AGTCAATCGCACCCACTTCC | CCCAGCAGTGAGACGACAAA |
| *Hif1a* | ACCTTCATCGGAAACTCCAAAG | CTGTTAGGCTGGGAAAAGTTAGG |
| *Hif2a* | CTGAGGAAGGAGAAATCCCGT | TGTGTCCGAAGGAAGCTGATG |
| *IL-6* | TAGTCCTTCCTACCCCAATTTCC | TTGGTCCTTAGCCACTCCTTC |

**Human**

| Gene | Forward (F) primers | Reverse (R) primers |
| --- | --- | --- |
| *PPARα* | GCGAGGATAGTTCTGGAAG | AGGATAAGTCACCGAGGAG |
| *PPARβ* | AGCTCAATGGGGGACC | AAGAAGCCCTTGCACCCC |
| *CPT1* | GCAGCGTTCTTTGTGACGTT | AGGAGTGTTCAGCGTTGAGG |
| *SCD1* | CTGGCTTGCTGATGATGTGC | GCACCACAGCATATCGCAAG |
| *CD36* | GCCAGTTGGAGACCTGCTTA | AGACTGTGTTGTCCTCAGCG |
| *FATP4* | TGTCAACGAGGACACCATGG | TCTCACCTTTCCAGCGGAAC |
| *APOA-IV* | GCTCCCTATGCTCAGGACAC | GCACCAGGGCTTTGTTGAAG |
| *RXR* | GGTCTATGCGTCCTTGGAGG | CTAAGTCATTTGGTGCGGCG |
| *FASN* | GAGGTGTCAGAGAACGGCAA | GTGTCCATGAAGCTCACCCA |
| *HMGCS2* | GCGTCTGTTGACTCCAGTGA | TGGGAAGTAGACCTCCAGGG |
| *SREBP1C* | CTGTTGGTGCTCGTCTCCTT | ACGGATGAGGTTCCAGAGGA |

**Extended Data Table 3. Overexpression of gene synthesis in *Escherichia coli***

| Gene | Sequence (nucleotide 5’→3’) |
| --- | --- |
| *ACOT1312* | ATGGAAAATTATAAGTATCCGAACGACAGTAAAATTATTAGTACTGATCAAGTATTAATTAATGATTTAAACAATTATAATACCTTATTTGGTGGCGTATTAATGAAAAAAATTGATAATAACGCTACTTTATCAGCACGAAGACATGCACGAGTTAAAGAATGTGTGACTGCATCCACTGATTCTATAGAATTTTTACATCCTATTACCCAATTAGACTCTGTTTGTATTGAATCTTATGTAGCTTATACAGGAGAAAAATCAATGGAAATATTTTGTAAAGTAATTGCAGAAGACATGATAACTGCTGAGCGAAAAATAGCTGCAGTTGCCTTTTTAACATTTGTTGCTCTAGATGAACATAAAAAACCAATCAAAGTAGCAAATATCACACCTCAAACCCAAGAAGAAAAATTATTGTATATGCATGGAGAAGATAGAGCAAACATGCGAAAGCATAGACGTCAACAAAGTAAACACCTTATTCAGTCACTTAATACAGTTAAGCCCTGGGCATTGGAGGTTGTAAACAAATGA |
| *ACOT2244* | ATGGGAAATGTAAAGCGTAAGTCAATGTCTGAATCAAGAAGTATTAAGGAAAGACAAGTCTTTCCGCAAGATACAAACCATTTGCATACAATGTTTGGAGGTATATTGATGGCAAATGTGGACGAAATTTCTGCAATAACTGCAACGAAGCATAGTAATTCCCAAGTAGTAACAGCTTCAACAGATTCTGTAGATTTTTTGAAACCGATTAAGACCGGTGATATAGTGTCATACGAAGCTATGGTGTCATATGCAGGACAATCATCTATGGAGGTTTGTGTACAAATTATTATAGAAGATATTATAAAAAATGAACGTCACTTAGCAGCTTTAAGCTTCTTAACTTTTGTTGCATTAGATGAGGATGGTAAACCACGAGAGGTACCTCAAGTATACCCAGAGACACAAACTGAAATGTGGTTTCATGACACGGCGCTTGCACGAGTGAAACGTAGAAAAGAACGTAGAAATGAAAGTAAAGAAACCATAGCATTTTTAGCAAATGCTCAAAATATGAAATAG |
| *TesA945127* | ATGATGAACTTCAACAATGTTTTCCGCTGGCATTTGCCCTTCCTGTTCCTGGTCCTGTTAACCTTCCGTGCCGCCGCAGCGGACACGTTATTGATTCTGGGTGATAGCCTGAGCGCCGGGTATCGAATGTCTGCCAGCGCGGCCTGGCCTGCCTTGTTGAATGATAAGTGGCAGAGTAAAACGTCGGTAGTTAATGCCAGCATCAGCGGCGACACCTCGCAACAAGGACTGGCGCGCCTTCCGGCTCTGCTGAAACAGCATCAGCCGCGTTGGGTGCTGGTTGAACTGGGCGGCAATGACGGTTTGCGTGGTTTTCAGCCACAGCAAACCGAGCAAACGCTGCGCCAGATTTTGCAGGATGTCAAAGCCGCCAACGCTGAACCATTGTTAATGCAAATACGTCTGCCTGCAAACTATGGTCGCCGTTATAATGAAGCCTTTAGCGCCATTTACCCCAAACTCGCCAAAGAGTTTGATGTTCCGCTGCTGCCCTTTTTTATGGAAGAGGTCTACCTCAAGCCACAATGGATGCAGGATGACGGTATTCATCCCAACCGCGACGCCCAGCCGTTTATTGCCGACTGGATGGCGAAGCAGTTGCAGCCTTTAGTAAATCATGACTCATAA |
