# Supplementary material for: Inhibition of oxygen-mediated opportunistic bacteria overgrowth in the ileum alleviates excessive fatty acid absorption against a high-fat diet
Source: Research Square preprint supplement (doi:10.21203/rs.3.rs-7956394/v1), 2025-11-06
Supplement: Supplementary file 2 [file 15539cb7449e1040c4a44317.docx]

**Highlights**

- HFD causes oxygen leakage in the ileum, leading to the oxygen-mediated opportunistic bacteria overgrowth
- Microbe-derived dodecanoic acid activates ileal PPARα-CD36 signaling, leading to excessive fatty acid absorption
- *Staphylococcus xylosus* exhibits a high capacity for DA production, which is associated with the substrate specificity of its ACOT enzyme
- Oat derived avenanthramide B demonstrates a specific inhibitory effect on *Staphylococcus xylosus*
