# Supplementary material for: Inhibition of oxygen-mediated opportunistic bacteria overgrowth in the ileum alleviates excessive fatty acid absorption against a high-fat diet
Source: Research Square preprint supplement (doi:10.21203/rs.3.rs-7956394/v1), 2025-11-06
Supplement: Supplementary file 3 [file 8dd69a8bd6930100f662ffb1.docx]

Graphical abstract
