# Supplementary material for: Inhibition of oxygen-mediated opportunistic bacteria overgrowth in the ileum alleviates excessive fatty acid absorption against a high-fat diet
Source: Research Square preprint supplement (doi:10.21203/rs.3.rs-7956394/v1), 2025-11-06
Supplement: Supplementary file 4 [file c453d0ab345a02b0efdb0683.xlsx]

## Sheet: Fig.1
weight/g	Time/day	Control						HFD						AVN B
	0	21.8	22.5	22.7	22.9	23.2	23.6	22.3	22.5	23	23.1	23.3	23.7	22.5	22.6	22.7	23	23.1	23.2
	7	23.2	24	24.1	24.1	24.2	24.6	23.5	24.2	25.7	25.3	25.4	26	22.7	24.4	24.5	24.8	25.5	25.8
	14	23.6	25	25	25.5	25.6	26.1	24.6	25.6	27	27	27.3	27.6	24.3	24.4	25.6	26.1	26.6	27
	21	24.8	25.2	26.6	26.6	26.7	26.7	26.5	28.6	28.8	28.9	29.1	29.6	25.5	25.6	26	26.3	28.4	28.6
	28	26	26.8	26.9	27.1	27.8	28	30.5	30.6	30.9	31.3	32.1	32.2	26.2	27.6	27.7	28	29	30
	35	26.5	27.3	27.5	27.8	28.1	28.7	30.7	31.6	31.7	32.6	32.9	34.5	26.9	27	28.1	28.4	29	30.2
	42	26.5	27.3	27.6	28	28.1	28.7	31.8	32.2	33.4	34.3	35.7	36.6	28.5	28.5	29.3	30	30	31
	49	26.7	27.8	27.9	28.9	28.9	29.7	33.5	34.1	34.6	36	37.2	38.8	28.9	29	30.8	31.2	31.3	31.9
	56	27.7	27.9	28.6	28.9	29.5	30.3	35.8	36.9	36.9	37.8	38.5	39.8	29.3	29.9	31.9	32.2	32.5	32.9
	63	27.9	28.4	29.3	29.4	29.7	31	36.9	38	38.3	38.8	39.6	40.8	29.6	29.8	32.2	33.1	33.8	33.9
	70	28.2	29.3	29.9	30.4	30.8	31.9	37.5	39	39.2	39.5	40.2	42.7	30	30.4	32.5	33.8	34.6	35.5
Energy intake	Time/day	Control			HFD			AVN B
	0	0	0	0	0	0	0	0	0	0
	7	77.3	68.5	79.5	89.4	72.7	77	81.9	81.1	73.8
	14	81.1	75.8	78.7	84.2	74.3	70.7	82.3	72.4	70.1
	21	83.1	75.9	81.4	88.7	88.9	76.2	83.1	86.8	74.7
	28	87	81.1	87.8	83.7	81.7	82.7	77.4	81.7	74.9
	35	89.3	79.6	81.6	92.7	89.8	82.8	94	85.4	77.8
	42	102.2	88.3	96.8	99.4	96.6	83.7	98.5	88.4	89.3
	49	99.4	89.1	99.9	102.7	104.8	95.6	96.6	95.9	85
	56	92.3	90.2	101.2	109.2	107.1	98.6	106.2	100.3	88.7
	63	101.1	95.3	104.9	108.5	111.3	99.8	101.5	100.6	103.4
	70	100.7	99.8	109.3	103.4	109.7	105.5	105.5	102.5	104.5
Epididymal fat weight	Control	0.4	0.7	0.4	0.5	0.5	0.6
	HFD	3.1	2.9	3.6	2.8	2.4	2.5
	AVN B	0.8	1.1	0.8	0.9	0.9	1.2
Liver weight	Control	0.95	0.94	0.84	1.02	0.99	1.04
	HFD	1.36	1.38	1.38	1.49	1.29	1.4
	AVN B	0.92	0.71	0.98	1.09	0.71	0.8
Serum total cholesterol	Control	1.854	1.961	3.066	3.28	3.708	3.886
	HFD	5.491	5.705	5.847	6.061	6.668	7.88
	AVN B	3.53	3.779	4.172	4.279	4.172	4.564
Serum triglyceridel	Control	0.709	0.765	0.989	0.989	1.027	0.915
	HFD	1.475	1.475	1.549	1.587	1.605	1.717
	AVN B	0.467	0.56	0.803	0.989	1.008	1.027
Serum high density lipoprotein cholesterol	Control	2.012	2.025	2.065	2.118	2.144	2.157
	HFD	1.826	1.84	1.853	1.853	1.879	1.879
	AVN B	2.104	2.157	2.21	2.224	2.224	2.396
Serum low density lipoprotein cholesterol	Control	1.037	1.072	1.144	1.227	1.394	1.501
	HFD	2.824	2.872	2.872	3.027	3.11	3.182
	AVN B	1.775	1.918	2.05	2.061	2.073	2.073
Hepatic total cholesterol	Control	0.013	0.017	0.017	0.024	0.03	0.049
	HFD	0.079	0.082	0.086	0.092	0.106	0.121
	AVN B	0.032	0.036	0.039	0.04	0.047	0.055
Hepatic triglyceridel	Control	0.087	0.106	0.127	0.13	0.142	0.149
	HFD	0.223	0.228	0.245	0.305	0.315	0.32
	AVN B	0.074	0.099	0.118	0.125	0.127	0.156
Hepatic high density lipoprotein cholesterol	Control	0.032	0.035	0.043	0.048	0.051	0.051
	HFD	0.008	0.013	0.021	0.024	0.035	0.035
	AVN B	0.035	0.037	0.037	0.043	0.043	0.054
Hepatic low density lipoprotein cholesterol	Control	0.021	0.024	0.025	0.032	0.039	0.04
	HFD	0.072	0.075	0.083	0.1	0.1	0.111
	AVN B	0.028	0.028	0.035	0.037	0.039	0.05
Lipid tolerance	Time/h	Control						HFD			AVN B
	0	0.479	0.665	0.85	0.403	0.686	0.784	0.926	1.198	1.057	0.697	0.752	0.501	0.915	0.403	0.959
	1	0.806	0.654	1.286	1.231	1.144	1.187	1.798	2.059	1.166	0.98	0.599	1.187	1.275	0.708	1.242
	2	1.471	1.394	0.97	1.928	1.569	2.07	2.658	2.048	2.255	2.375	1.405	1.689	1.885	1.166	1.776
	3	1.83	1.819	1.198	2.048	2.005	1.928	3.018	2.266	2.451	2.266	1.71	2.103	2.255	1.525	1.874
	4	1.394	1.547	1.013	1.471	1.503	1.765	2.473	1.928	1.896	1.928	1.493	1.394	1.885	1.601	1.71
Lipid tolerance (AUC)		Control			HFD			AVN B
		5.47	0.4269	6	8.697	0.5082	6	5.857	0.4447	6
Bacteria Ace index	Control	298.095	363.182	314.319	330.731	297.389	261.274
	HFD	121.327	91.6229	149.248	122.93	116.211	106.312
	AVN B	121.271	124.619	140.011	212.379	183.364	181.323
Bacteria Shannon index	Control	2.33899	3.21746	2.74457	2.76152	2.19337	2.22851
	HFD	1.37127	1.11717	1.65676	1.37892	1.50757	1.52804
	AVN B	1.95148	1.92186	1.94875	2.48408	1.98244	1.58311
Staphylococcus_xylosus	Control	0.187043	0.016574	0.00032695	0.00206232	7.55e-05	0.00065391
	HFD	0.57911	0.498931	0.457458	0.533135	0.606323	0.625638
	AVNB	0.124368	0.180151	0.15895	0.346546	0.363874	0.269058
		Control						HFD						AVN B
Staphylococcus_xylosus-Lipid tolerance (AUC)	Staphylococcus_xylosus	0.187043	0.016574	0.00032695	0.00206232	7.55e-05	0.00065391	0.57911	0.498931	0.457458	0.533135	0.606323	0.625638	0.124368	0.180151	0.15895	0.346546	0.363874	0.269058
	Lipid tolerance (AUC)	5.044	4.973	4.386	6.144	5.813	6.46	9.174	7.936	7.349	8.775	9.659	9.292	6.934	4.837	5.927	6.815	4.401	6.227
Population-S.xylosus	health	0.07643	0.07642	0.0656	0.06483	0.05096	0.04889	0.03804	0.03715	0.0237	0.02258	0.01379	0.0127	0.01056	0.00698	0.0061	0.00467	0.00361	0.00239	0.00111
	obesity	0.06675	0.06381	0.06195	0.04883
health	ProjectID	PRJEB6337	PRJNA375935	PRJNA447983	PRJNA650244	PRJEB7774	PRJEB6997	PRJNA422434
obesity	ProjectID	PRJEB12357

## Sheet: Fig.2
IF Duodenum PPARa	Control	1.21	0.85	1.04	0.63	1.19	1.28	0.85	0.95	0.7
	HFD	1.4	1.58	1.92	2.03	2.14	2.2	2.65	2.85	2.96
	AVN B	1.59	1.51	1.73	1.16	0.98	1.9	1.19	1.77	2.1
IF jejunum PPARa	Control	0.96	0.46	0.83	1.1	1.1	1.18	1.34	0.88	1.16
	HFD	1.74	2.04	2.21	2.23	2.31	2.47	2.67	3.09	3.6
	AVN B	1.15	1.38	1.53	1.9	2.08	2.22	2.48	2.02	2.2
IF Ileal PPARa	Control	0.69	0.88	1.1	1.54	0.67	0.99	1.26	0.87	0.85
	HFD	1.66	2.07	2.14	2.31	2.32	2.3	2.79	3.14	4.07
	AVN B	1.28	1.28	1.35	1.39	1.41	1.44	1.77	2.03	2.21
Ileal RT-qPCR		Control						HFD						AVN B
	Pparα	0.866433	1.13357	0.632752	1.36725	0.990566	1.00943	1.99071	2.11992	1.51633	2.86445	2.70819	2.01461	0.857087	1.1446	1.13737	1.33232	1.35622	1.59813
	Rxr	0.99302	1.00698	0.814666	1.18533	1.10514	0.894863	1.21387	1.74017	1.72582	1.69182	1.30685	1.5377	1.32117	1.05602	0.971343	0.834875	0.540107	0.928841
	Cpt1	1.10005	0.89995	0.880329	1.11967	1.07107	0.928925	2.76559	2.01809	1.64853	2.02824	2.99692	1.56736	1.22385	1.0223	0.671521	0.968494	0.952969	1.47967
	Hmgcs2	0.790536	1.20946	0.813657	1.18634	0.73836	1.26164	1.42606	1.33724	2.27434	1.62495	1.55165	2.09559	0.449394	0.998499	0.65219	1.15751	0.886435	0.955692
	Cd36	0.687476	1.31252	0.645633	1.35437	0.729469	1.27053	1.53776	1.95501	1.7551	1.52693	2.51475	1.86981	0.946196	0.755151	0.831601	1.18388	0.625556	1.08739
	Fatp4	1.13258	0.867419	0.851406	1.14859	0.869154	1.13085	1.29601	1.23481	0.912447	1.28431	1.26496	1.19947	1.63247	1.41132	1.53976	1.70003	1.40849	1.90571
	ApoA-I	0.953551	1.04645	0.824185	1.17581	0.649213	1.35079	1.37741	2.18507	1.81108	1.01776	1.79381	1.01078	1.94825	0.644427	1.31418	1.43379	0.94929	2.19036
	ApoA-IV	0.636643	1.36336	0.967373	1.03263	1.22565	0.774349	2.09007	1.98828	1.27424	1.45218	1.47509	1.76909	1.01922	0.974789	0.45628	0.891441	0.758246	1.15487
	Srebp1c	0.727815	1.27218	1.34701	0.652985	1.01034	0.989664	1.95478	2.40048	2.0668	1.74362	1.43957	1.91494	0.760039	1.45285	1.44366	0.936207	0.451577	1.12312
	Fasn	1.09409	0.905912	0.642174	1.35783	0.7176	1.2824	2.64854	1.61122	1.37488	1.60093	0.980733	0.52588	0.81938	0.575933	1.50462	0.924545	1.81604	1.40889
	Scd1	1.39549	0.604508	0.810344	1.18966	0.695389	1.30461	2.87595	1.94592	1.823	2.03225	1.788	1.67696	0.909527	1.21482	1.26212	0.681016	1.3307	0.712889
IF Ileal CD36	Control	1.15	0.73	1.07	1.26	1.42	0.58	0.87	1.14	1.52
	HFD	2.01	2.15	2.25	2.35	2.48	2.97	3.29	4.7	5.66
	AVN B	0.93	1.24	1.34	1.42	1.48	1.66	1.67	1.8	2.05

## Sheet: Fig.3
Staphylococcus_xylosus-Dodecanoic acid	Control					HFD					AVN B
	Staphylococcus_xylosus	0.00065391	0.016574	0.187043	0.00206232	7.55e-05	0.625638	0.606323	0.457458	0.57911	0.498931	0.269058	0.346546	0.180151	0.15895	0.124368
	Dodecanoic acid	-1.18458	-1.18458	-1.18458	-1.18458	-1.18458	0.533687	2.08192	0.77205	0.385239	1.1506	0.325433	0.299071	0.00094326	0.311462	0.0625063
Lactobacillus_reuteri-Lactic Acid	Control					HFD					AVN B
	Lactobacillus_reuteri	5.03e-05	0	0.0004527	0	0	0.00412464	0.00653907	0.0002515	0.00256533	0.00077966	0.0170267	0.0164734	0.0131536	0.00671512	0.027112
	Lactic Acid	-1.0159	-1.25166	-0.98275	-1.10052	-1.32907	-0.006002	-0.0582806	-0.0720821	0.764711	0.0801183	0.724483	1.12119	0.611114	0.379562	2.13509
Weight	Time/day	HFD						ACT						AAB						INB						IAB
	0	20.8	20.8	20.9	21.4	21.4	21.9	20.8	20.8	20.8	21.6	22	22	20.7	21.1	21.2	21.3	21.5	21.6	20.8	20.9	20.9	21	21	21.1	20.9	21.2	21.2	21.3	21.5	21.8
	3.5	20.9	21.9	22	22.1	22.4	22.5	22.7	22.7	22.7	22.8	22.8	23.1	20.9	21.4	21.6	22	22.1	22.2	21.6	21.7	21.8	21.8	22.1	22.3	21.5	21.1	21.8	22.1	22.5	22.5
	7	21.6	22.8	22.9	23	23.1	23.2	23.1	23.3	23.3	23.5	23.6	23.9	21.5	22.3	22.8	22.9	23.1	23.1	21.8	22	22.2	22.3	23.1	23.4	22	22.3	22.4	23	23.2	23.3
	10.5	22.1	23	23.3	23.6	23.8	23.9	24.1	24.1	24.5	24.6	24.6	25.8	21.9	22.4	22.5	23.3	23.4	23.7	22.3	22.5	22.7	22.9	23.1	23.5	22.5	22.7	22.7	22.9	23.6	23.8
	14	23.8	24.1	24.2	24.6	24.8	24.8	25	25	25	25.5	26	26.4	22.6	23.4	23.6	24.1	24.1	24.3	23	23	23.6	23.9	24	24.5	23.3	23.4	23.6	23.7	24.1	24.1
	17.5	24.4	24.4	24.6	25	25	25	25.5	25.6	25.6	26	26.1	26.8	23.6	23.8	24	24.3	24.5	24.8	23.1	23.5	23.5	23.6	24.6	24.8	23.5	23.7	23.6	24.6	25	25
	21	25.2	25.2	25.5	25.5	25.6	25.6	25.5	26	26.4	26.6	27	27.9	23.5	24.4	24.6	24.8	25	25	23.1	23.3	23.7	24.2	24.6	25.4	23	24	24.2	24.2	25	25.3
	24.5	25.3	25.8	26	26.2	26.3	26.5	26.8	27	27.5	27.6	28	29	24	24.6	24.9	24.9	25.1	25.3	23.8	23.9	24.7	24.7	25	25.6	23.5	24.3	24.3	24.5	25	25.3
	28	26.2	26.4	26.6	26.7	26.8	28	27.6	27.8	28.1	28.2	28.8	29.6	24.6	24.6	25.5	25.8	25.9	25.9	24.6	24.6	25	25.4	25.8	25.9	23.6	23.8	25.4	25.5	25.2	25.3
Fat index	HFD	0.027	0.034	0.027	0.04	0.032	0.035
	ACT	0.032	0.035	0.034	0.034	0.047	0.048
	AAB	0.021	0.018	0.017	0.021	0.02	0.025
	INB	0.022	0.021	0.017	0.013	0.021	0.016
	IAB	0.013	0.025	0.018	0.021	0.02	0.021
Serum triglyceridel	HFD	0.989	1.227	1.37	1.394	1.406	1.692
	ACT	1.43	1.501	1.537	1.68	1.811	2.097
	AAB	0.798	0.906	1.156	1.156	1.311	1.382
	INB	0.763	0.786	0.941	1.013	1.144	1.191
	IAB	0.703	0.87	0.894	1.013	1.144	1.215
Hepatic triglyceridel	HFD	0.2	0.204	0.209	0.212	0.224	0.225
	ACT	0.239	0.264	0.277	0.287	0.319	0.339
	AAB	0.153	0.171	0.185	0.185	0.188	0.188
	INB	0.177	0.186	0.191	0.194	0.2	0.201
	IAB	0.149	0.15	0.165	0.166	0.177	0.183
Lipid tolerance	Time/h	HFD						ACT						AAB						INB						IAB
	0	0.989	1.227	1.37	1.394	1.406	1.692	1.43	1.501	1.537	1.68	1.811	2.097	0.798	0.906	1.156	1.156	1.311	1.382	0.763	0.786	0.941	1.013	1.144	1.191	0.703	0.87	0.894	1.013	1.144	1.215
	1	1.825	1.908	1.908	1.963	2.127	2.21	2.182	2.347	2.443	2.745	2.937	3.143	1.29	1.496	1.606	1.757	1.922	1.935	1.208	1.359	1.565	1.716	1.729	1.963	1.043	1.359	1.4	1.524	1.688	1.853
	2	2.165	2.224	2.383	2.522	2.78	2.8	2.979	2.999	2.939	3.396	3.793	4.19	1.509	1.529	1.986	2.006	2.105	2.125	1.33	1.47	1.509	1.966	2.045	2.224	1.211	1.609	1.648	1.708	1.887	2.125
	3	1.739	2.079	2.121	2.164	2.206	2.439	2.397	2.439	2.779	3.033	3.182	3.67	1.188	1.4	1.633	1.718	1.803	2.121	1.379	1.294	1.358	1.718	1.888	2.036	1.039	1.103	1.188	1.4	1.633	1.718
	4	1.224	1.388	1.6	1.624	1.929	1.976	1.929	2.024	2.306	2.306	2.494	3.129	1.129	1.153	1.2	1.341	1.365	1.529	1.106	1.153	1.247	1.341	1.365	1.506	0.965	0.988	1.153	1.153	1.247	1.412
Lipid tolerance (AUC)	HFD			ACT			AAB			INB			IAB
	8.079	0.3294	6	10.95	0.6158	6	6.39	0.3784	6	6.089	0.4082	6	5.586	0.3772	6
Ileal RT-qPCR	Cd36	0.889549	1.11045	1.10703	0.892974	0.785063	1.21494	2.05786	3.29698	2.12386	1.77361	1.70631	2.25149	0.590966	0.847418	0.676747	0.481861	0.185679	0.473318	0.732625	0.460459	0.416587	0.309217	0.599105	0.332374	0.599215	0.287403	0.468685	0.343097	0.611694	0.528832
	Pparα	0.707298	1.2927	1.07265	0.927348	0.986138	1.01386	1.67063	1.85368	2.79177	2.75334	2.12854	1.853	0.554935	0.5785	0.629022	0.57482	0.476273	0.615513	0.664522	0.316525	0.490112	0.620362	0.486281	0.46005	0.659932	0.429399	0.348972	0.196307	0.226858	0.524808
IF PPARA	HFD	1.04	0.93	0.97	1.05	1.03	0.97	0.98	1	1
	ACT	0.95	1.23	1.4	1.43	1.44	1.55	1.63	1.66	1.68
	AAB	0.6	0.58	0.59	0.88	1.03	0.91	0.81	0.58	0.82
	INB	1.2	0.6	0.5	0.61	0.78	0.79	1.21	0.85	0.91
	IAB	0.62	0.85	0.68	0.84	0.76	0.73	0.56	0.81	0.67
IF CD36	HFD	0.85	1.04	1.19	0.99	0.68	1.03	1.26	1.07	0.86
	ACT	1.21	1.61	1.06	1.33	1.63	1.53	1.44	1.52	1.3
	AAB	0.73	0.8	0.85	1.04	0.88	0.63	0.75	0.73	0.75
	INB	0.89	0.8	0.73	0.85	1.12	0.97	0.98	0.9	0.79
	IAB	1.09	0.51	0.56	0.69	0.92	0.86	0.77	0.56	0.8

## Sheet: Fig.4
Weight	Time/day	Control						HFD						L-DA						H-DA
	0	24.8	25.2	25.2	25.6	25.7	26.1	25	25	25.8	25.8	26	26	24.7	24.8	25	25.9	26.5	26.6	24.6	24.8	24.9	25.8	26.4	26.4
	3.5	24.8	25.3	25.4	25.5	25.6	26.3	25.6	26.2	26.3	26.4	26.4	26.5	25.7	26	26.5	26.7	27	27.2	24.5	24.8	25.6	26.3	26.5	26.8
	7	24.8	25.5	25.5	25.7	25.8	26.4	26	26.6	26.7	26.8	27.2	27.2	26.3	26.5	27.5	27.6	27.7	27.9	24.9	25.2	26	26.6	26.8	26.8
	10.5	25.3	25.4	25.5	25.8	25.9	26.4	27	27	27.2	27.3	27.6	27.8	28	28.2	28.3	28.5	28.8	29	26	26.3	26.5	26.7	26.9	28.2
	14	25.3	25.6	26.2	26.3	26.3	26.4	27.6	27.8	28.1	28.2	28.4	28.4	28.6	28.8	29.1	29.3	30	30	25.9	26.8	26.8	27.1	27.9	28.7
	17.5	25.6	25.8	25.8	25.9	26.4	26.5	27.9	28	28.1	28.2	28.5	28.5	29.8	30	30.6	30.6	30.7	31.1	26.5	26.7	27	27	27.6	28
	21	25.3	25.5	25.7	26.5	26.6	26.6	28.2	28.5	28.5	28.5	28.6	28.6	30.5	30.6	30.6	30.7	30.9	31.2	26.4	26.6	26.6	26.9	27	27.3
	24.5	25.3	26.2	26.5	26.7	26.8	26.8	28.2	28.3	28.6	29.6	29.6	29.7	31.5	31.6	31.7	31.8	31.8	32	26.8	26.8	26.9	27.2	27.6	28.2
	28	25.3	25.5	26.5	26.5	26.8	26.9	28.6	29	29.1	29.5	29.3	29.6	32	32	32.2	32.3	32.2	33	26.3	26.8	27	27.1	27.3	27.8
Serum triglyceridel	Control	0.514	0.547	0.613	0.645	0.678	0.744
	HFD	0.809	0.864	0.908	0.973	1.039	1.072
	L-DA	1.127	1.083	1.094	1.269	1.345	1.389
	H-DA	0.58	0.634	0.689	0.744	0.788	0.82
Lipid tolerance		Control						HFD						L-DA						H-DA
	0	0.514	0.547	0.613	0.645	0.678	0.744	0.809	0.864	0.908	0.973	1.039	1.072	1.127	1.083	1.094	1.269	1.345	1.389	0.58	0.634	0.689	0.744	0.788	0.82
	1	0.744	0.678	0.416	0.831	1.039	0.875	1.225	1.717	1.422	0.919	1.4	1.455	1.903	1.488	1.859	1.619	2.1	1.881	1.838	1.313	1.247	1.433	0.897	1.159
	2	0.809	0.941	0.438	1.28	1.225	1.498	1.673	1.958	0.798	2.078	1.838	2.056	2.45	2.472	2.625	1.838	2.68	2.92	2.319	2.045	1.794	1.958	2.089	1.477
	3	0.963	0.897	0.711	1.269	1.367	1.531	1.772	1.892	1.444	1.925	2.264	1.816	2.527	2.483	2.625	2.023	2.789	3.041	2.045	1.794	1.641	1.586	1.531	1.28
	4	0.7	0.569	0.602	0.93	0.984	1.17	1.597	1.75	1.214	1.69	2.078	1.597	2.33	2.144	2.406	1.553	2.253	2.57	1.378	1.203	1.4	1.159	1.192	0.984
Lipid tolerance (AUC)	Control			HFD			L-DA			H-DA
	3.643	0.4004	6	6.241	0.4571	6	8.601	0.4292	6	5.872	0.3627	6
		Control						HFD						L-DA						H-DA
Ileal RT-qPCR	Pparα	1.27358	0.726424	1.13435	0.865653	0.621284	1.37872	1.54637	1.75186	1.70747	1.88147	1.73306	1.55114	2.54715	2.88563	2.43153	3.32156	2.6635	3.25651	3.38436	3.2018	4.29263	5.17609	5.25367	4.12194
	Cd36	1.0623	0.937698	0.788371	1.21163	0.828427	1.17157	1.78657	2.01	1.58771	1.88812	1.85118	1.58936	3.80315	3.06778	2.80295	3.427	2.90482	2.54638	4.02	3.3804	2.84208	3.69852	2.34315	3.60112
IF PPARA	Control	0.65	0.7	0.87	1.03	1.13	1.19
	HFD	0.97	1.02	1.05	1.33	1.36	1.36
	L-DA	1.32	1.32	1.34	1.37	1.49	1.56
	H-DA	1.59	1.61	1.62	1.77	1.79	1.83
IF CD36	Control	0.82	0.86	0.99	1.03	1.03	1.03
	HFD	2.45	2.57	2.69	2.72	3.04	3.24
	L-DA	3.23	4.5	4.71	5.12	6.35	6.26
	H-DA	4.15	4.65	4.67	4.7	4.8	5.79
Hepatic RT-qPCR		Control						HFD						L-DA						H-DA
	PPARα	1.10703	0.892974	1.27358	0.726424	0.875877	1.12412	0.804793	1.07675	0.800451	0.869878	1.10865	1.69208	0.924464	1.35349	0.741688	1.14781	1.29128	1.94369	2.31145	2.60052	2.22945	3.59674	2.49473	2.26402
	RXR	0.81166	1.18834	1.19168	0.808319	0.801652	1.19835	1.46302	0.900593	1.50838	1.04463	0.51443	1.18185	1.32772	0.906857	0.759435	1.68529	1.06514	1.11038	2.27986	1.90389	2.6081	1.89605	2.73406	3.16246
	CPT1	1.05194	0.948061	0.923901	1.0761	0.600697	1.3993	1.03746	0.559826	0.700186	0.804303	0.803689	0.792624	0.451579	0.703709	0.523336	0.455591	1.09029	1.22664	2.16551	2.19574	2.53687	1.81888	2.05027	4.64542
	HMGCS2	0.707298	1.2927	0.948061	1.05194	1.14115	0.858854	1.16505	1.05	1.49801	0.743833	0.758113	0.747675	1.2661	0.801286	0.922136	1.68535	0.521408	1.18139	2.0855	1.87955	2.77608	3.21106	2.18932	3.38812
	CD36	1.27998	0.720024	1.16821	0.831793	0.732849	1.26715	1.51164	1.12984	1.29621	1.4283	1.03641	1.39628	1.07633	1.26235	1.37011	1.46845	1.73098	1.36754	1.70069	1.95358	2.4021	3.08292	2.10175	1.649
	FATP4	0.81166	1.18834	0.910134	1.08987	1.12071	0.879291	1.05625	1.32772	1.35112	1.20093	1.06026	1.1285	1.23025	1.15584	1.3891	0.873059	0.968895	1.38935	1.57893	2.24848	1.87144	2.43539	1.73437	2.87669
	ApoA-IV	1.15132	0.848679	1.13775	0.862252	1.24774	0.752265	1.84458	1.12763	0.976831	0.892659	1.17228	1.30072	1.04485	0.928704	0.720056	1.7365	0.926146	0.817512	2.95527	2.10423	1.83551	2.74381	1.60138	2.31227
	PPARβ	0.804983	1.19502	0.726424	1.27358	1.09674	0.903263	0.977407	0.413807	1.87759	1.07095	1.18363	1.42723	0.799423	1.09204	0.69202	1.83895	1.20015	0.497655	1.9821	0.761561	1.37448	1.52508	1.19186	2.06082
Weight	Time/day	Control						CDA
	0	21.9	22.5	22.5	22.5	23.2	23.5	22	22.6	22.7	22.8	23.2	23.6
	3.5	22	22.4	22.7	23	23.3	23.5	22.4	22.9	23	23.4	23.4	23.9
	7	22.7	22.7	23.4	23.5	23.5	24	22.9	23	23.6	23.6	24.1	24.3
	10.5	22.7	23.3	23.5	23.8	24.4	24.5	23.6	23.8	23.9	24.2	24.2	24.3
	14	22.7	23.9	23.9	23.9	24.3	24.9	24	24	24.1	24.2	24.5	24.5
	17.5	23.3	23.6	23.8	24.8	25.1	25.4	24.4	24.4	24.5	25	25.1	25.1
	21	23.7	24	24.7	25.2	25.8	25.8	24.9	25	25.1	25.4	25.5	25.7
	24.5	24	24.4	24.8	25.7	25.8	26.1	24.8	25.2	25.3	25.5	25.8	26
	28	24.3	25	25.1	25.6	26.3	26.4	25.3	25.4	25.6	25.9	25.9	26.2
Lipid tolerance	Time/h	Control						HFD
	0	1.47	1.331	1.297	1.902	1.643	1.815	1.487	1.677	1.418	1.573	1.781	1.643
	1	2.006	1.314	1.781	2.455	2.17858	2.28232	2.473	2.317	2.075	2.611	2.542	2.438
	2	2.576	2.317	2.697	2.473	2.42065	2.28232	3.164	2.576	3.026	2.507	2.87	2.697
	3	3.285	2.801	2.801	2.991	2.62813	2.47252	2.749	3.026	3.13	3.631	3.648	3.441
	4	3.268	2.213	2.127	2.697	2.19587	2.35148	2.836	3.233	3.596	3.009	2.87	2.853
Lipid tolerance (AUC)	Control			HFD
	9.319	0.4475	6	10.82	0.3794	6
		Control						CDA
Ileal RT-qPCR	Pparα	1.18165	0.818354	1.13435	0.865653	0.882707	1.11729	1.31112	1.53772	1.05107	2.3487	2.20382	1.20581
	Cd36	1.18499	0.815005	0.788371	1.21163	0.707298	1.2927	1.49992	1.098	1.22854	2.45708	1.50565	1.85368
Weight	Time/day	HFX						DAX						ACX
	0	22.4	22.7	22.8	22.9	23.1	23.4	22.5	23.1	23.1	23.2	23.3	23.5	22.8	23.1	23.1	23.2	23.2	23.2
	7	20	20.3	20.7	21.4	22.4	22.8	21	21.3	21.3	22.3	22.9	23	20.3	20.4	21	21.6	22	22.6
	14	23.5	23.6	23.6	24.2	24.6	24.6	24.3	24.5	24.7	24.9	25.1	25.2	23.9	24.2	24.4	24.6	24.7	25
	21	24.1	24.1	24.5	24.6	25.1	25.1	25.2	25.3	25.9	26	26.3	26.8	25.6	25.7	25.9	25.9	26.1	26.5
	28	25.1	25.2	25.3	26	26.2	26.3	26.5	26.9	27.5	27.6	27.8	28.6	27.3	27.3	27.4	27.6	28.5	28.6
	35	25.5	25.9	26	26.1	27.3	27.6	27.8	28.4	28.6	28.7	29.4	29.7	28.2	28.7	29.1	29.2	30	30.7
	42	26.4	26.8	27	27.8	28	28.1	29.5	29.5	30.6	30.8	31.9	32.2	30.3	30.5	30.9	30.9	32	32.3
	49	28.1	28.7	29	29.1	29.2	30.1	30.7	30.7	31.5	33.1	33.5	33.5	31.7	32.1	32.3	32.6	33.3	34.2
Lipid tolerance	Time/h	HFX						DAX						ACX
	0	0.914	0.954	0.975	1.056	1.178	1.157	1.442	1.299	1.726	1.766	2.01	2.193	1.787	1.462	1.178	1.543	1.766	2.071
	1	1.888	2.193	1.34	1.076	1.178	1.563	2.172	1.807	2.396	2.051	2.274	1.746	2.396	2.071	2.599	2.254	2.193	2.477
	2	2.903	1.99	2.152	2.7	2.193	2.578	2.985	2.619	3.228	3.269	3.127	3.472	3.492	3.228	2.863	3.715	3.309	3.188
	3	2.457	2.315	2.051	2.599	2.051	1.929	3.066	2.802	2.782	2.416	3.025	3.005	3.208	2.863	2.802	3.634	2.782	2.985
	4	1.929	2.091	1.665	2.172	1.848	1.787	2.721	2.416	2.213	2.152	2.538	2.254	2.599	2.782	2.254	2.213	2.863	2.477
Lipid tolerance (AUC)	HFX			DAX			ACX
	7.67	0.4527	6	10.1	0.3816	6	11	0.3955	6
Ileal RT-qPCR	Pparα	1.10703	0.892974	0.896401	1.1036	0.996534	1.00347	1.28939	1.81088	1.89502	2.60668	2.02089	1.61887	3.24156	1.57646	4.4451	2.5708	2.50531	3.00006
	Cd36	1.24448	0.75552	1.0381	0.961895	1.20168	0.798325	2.04988	1.58616	1.43789	1.99163	1.39963	1.85967	2.03572	1.44949	2.62798	1.47831	2.52284	2.06343
		NC						OA						OA+AVNB						AVNB
PPARA-RT-qPCR-AVNB	PPARα	1.06141	0.938591	1.06099	0.93901	0.98	1.02	1.82063	2.146	1.285	1.642	1.729	2.072	0.983	1.75662	1.303	1.68543	1.937	1.566	0.725	0.93728	0.418	1.04728	1.079	0.991
	PPARγ	0.945655	1.05435	1.02431	0.975688	1.071	0.929	1.507	1.007	0.533	1.453	1.635	1.181	1.41	1.89986	1.042	1.69591	0.713	1.304	0.931	1.064	1.60755	0.543	1.162	0.64
	RXR	0.9171	1.0829	1.10906	0.890943	0.933	1.067	1.457	0.659	1.623	1.27501	1.743	0.758	2.087	0.974884	1.804	1.0125	1.554	0.954	0.961955	1.686	1.845	0.82334	0.957	1.092
	CPT1	0.990442	1.00956	1.13063	0.869373	1.076	0.924	1.84	1.882	2.372	1.2	1.646	1.813	1.224	0.867	0.745	1.664	1.352	0.968	0.662	0.753	0.875	1.169	0.498	1.222
PPARA-RT-qPCR		0 μM				50 μM				100 μM
	C4	1.72792	2.31184	2.07488	2.78375	2.98771	2.34411	3.06743	3.38002	2.58918	2.95365	2.59371	1.6189
	C6	1.72792	2.31184	2.07488	2.78375	2.56514	1.82645	3.35667	1.91458	2.91298	2.4326	2.4538	3.66805
	C8	1.72792	2.31184	2.07488	2.78375	3.47988	4.05314	3.40353	3.72446	3.41645	2.85304	5.04556	3.49433
	C10	1.72792	2.31184	2.07488	2.78375	3.45585	2.56514	3.40353	3.72446	2.89286	3.66166	5.44531	4.39242
	C12	1.72792	2.31184	2.07488	2.78375	3.57772	5.38534	4.30804	3.64781	5.82597	4.38476	7.59482	4.9761
	C14	1.72792	2.31184	2.07488	2.78375	2.8462	3.96972	3.62261	2.70763	3.5125	4.83159	5.22349	4.01393
	C16	1.72792	2.31184	2.07488	2.78375	2.52983	4.49724	3.06743	2.26111	1.68471	1.63864	4.09827	2.18104
	C18	1.72792	2.31184	2.07488	2.78375	1.60107	1.95754	1.11499	2.74543	2.83333	3.68713	3.93132	2.03498
	C20	1.72792	2.31184	2.07488	2.78375	1.76423	1.4231	1.36323	2.19928	3.87044	4.66701	6.08398	4.2428
Intracellular TG	CON	OA	OA+DA	PPARα-KO	PPARα-KO-OA	PPARα-KO-OA+DA	NT	NT-OA	NT-OA+DA
	0.063	0.232	0.52	0.047	0.217	0.157	0.043	0.216	0.501
	0.047	0.257	0.46	0.055	0.116	0.182	0.057	0.252	0.442
	0.028	0.298	0.407	0.028	0.199	0.281	0.031	0.258	0.518
	0.072	0.263	0.434	0.08	0.15	0.252	0.07	0.287	0.468
PPARA-RT-qPCR	CON	OA	OA+DA	PPARα-KO	PPARα-KO-OA	PPARα-KO-OA+DA	NT	NT-OA	NT-OA+DA
	0.835162	2.01409	6.63515	0.118268	0.258839	0.131226	1.06447	2.09962	6.5438
	1.16484	2.75133	4.65935	0.0733087	0.193463	0.332201	0.95935	3.07402	4.82366
	0.855459	2.55756	5.91661	0.118649	0.226059	0.313116	1.02439	2.85753	5.91661
	1.14454	1.95175	7.08501	0.0121304	0.212387	0.439754	0.916858	1.979	7.75308
	1.11387	3.47156	7.70388	0.10552	0.184998	0.335779	1.10618	3.21671	7.86575
	0.886127	2.3385	5.87906	0.0298854	0.212507	0.512486	0.826786	3.72073	4.67701

## Sheet: Fig.5
Hypoxia score	Control	2.63	2.57	1.64	1.44	2.37	1.65	1.83	1.46	1.81
	HFD	1.14	0.94	1.21	1.03	0.73	0.98	0.96	1.35	0.66
	AVNB	1.72	1.8	2.55	1.37	1.14	1.6	1.75	1.84	2.22
Ileal RT-qPCR HIF		Control						HFD						AVN B
	Hif-1α	0.944605	1.0554	0.982673	1.01733	0.906697	1.0933	2.39128	1.35452	1.61864	1.42878	2.09753	1.02009	1.50294	2.39128	3.30531	1.53133	1.62303	2.61841
	Hif-2α	1.19835	0.801652	0.979209	1.02079	1.28953	0.71047	0.742801	0.470103	0.768271	0.411706	0.413754	0.640311	1.08752	0.859189	1.43365	1.02789	0.627134	1.05471
S.xylosus	Time/h	Aerobic				Hypoxia
	0	0	0	0	0	0	0	0	0
	2	0.027	0.025	0.035	0.037	0	-0.002	-0.002	0.006
	4	0.027	0.036	0.05	0.04	0.001	0	0.002	0.003
	6	0.173	0.175	0.176	0.19	0.003	0.001	0.004	0.004
	8	0.398	0.402	0.395	0.402	0.011	0.012	0.011	0.011
	10	0.509	0.501	0.502	0.511	0.2	0.186	0.199	0.192
	12	0.616	0.596	0.608	0.61	0.292	0.286	0.281	0.297
	14	0.667	0.641	0.649	0.657	0.297	0.302	0.304	0.299
	16	0.67	0.659	0.664	0.655	0.315	0.291	0.304	0.32
	18	0.674	0.682	0.69	0.681	0.306	0.296	0.336	0.331
	20	0.684	0.688	0.681	0.674	0.325	0.308	0.313	0.325
	22	0.693	0.677	0.684	0.688	0.319	0.332	0.323	0.326
	24	0.69	0.674	0.687	0.688	0.322	0.321	0.32	0.329
S.xylosus plate colony counts	Aerobic	8.58659	8.65514	8.50243	8.81823
	Hypoxia	6.53148	6.90309	6.77815	7.15229
L.reuteri		Aerobic				Hypoxia
	0	0	0	0	0	0	0	0	0
	2	0	0.005	-0.002	0.008	0.002	0.007	0.003	0.004
	4	0.006	0.006	0	0.003	0.012	0.016	0.013	0.017
	6	0.032	0.031	0.026	0.029	0.083	0.079	0.073	0.076
	8	0.125	0.13	0.139	0.128	0.196	0.202	0.206	0.198
	10	0.153	0.142	0.15	0.142	0.381	0.385	0.393	0.414
	12	0.245	0.242	0.232	0.247	0.497	0.493	0.489	0.486
	14	0.25	0.258	0.255	0.249	0.605	0.611	0.622	0.605
	16	0.268	0.247	0.255	0.27	0.65	0.658	0.65	0.657
	18	0.259	0.252	0.287	0.281	0.668	0.672	0.655	0.674
	20	0.278	0.264	0.264	0.275	0.678	0.665	0.668	0.672
	22	0.272	0.288	0.274	0.276	0.678	0.666	0.667	0.656
	24	0.275	0.277	0.271	0.279	0.663	0.675	0.673	0.679
L.reuteri plate colony counts	Aerobic	7.14	7.8	7.58	7.66
	Hypoxia	8.27875	8.39094	8.7007	8.57287
Weight	Time/day	HFX						HFS						HSL						HSB						ASA
	0	22.3	22.5	22.7	23.2	23.3	23.5	22.3	22.6	23	23.4	23.6	23.7	22.4	22.5	22.7	22.9	22.9	23.1	22.6	22.7	22.7	23.1	23.1	23.6	22.2	22.4	22.6	22.7	22.7	22.7
	7	20.3	20.9	21.4	21.7	22.4	22.5	18.7	20	20.4	21.4	22.2	23.6	18.3	21.1	21.7	21.9	22.8	22.8	20.7	20.8	21.9	22.2	22.7	23.5	21.7	21.7	22	22.1	22.1	22.3
	14	23.7	24.7	25.2	25.6	25.7	25.9	24.2	24.7	24.8	25.2	25.6	26.2	24.3	24.4	24.8	25.2	25.2	25.3	24.6	25	25.1	25.2	25.9	26	23.4	23.8	24.6	25.1	25.2	25.7
	21	24.4	25.9	26.6	26.8	27	27	25.6	25.8	26.1	27.7	27.8	27.9	25.9	26.1	26.6	26.8	27	29.4	26	26.2	26.6	26.9	27.1	27.9	25	25.8	26.1	27	27.5	27.6
	28	25.6	26.7	26.7	27	27.2	27.2	25.6	27.3	27.4	27.5	27.9	28	26.1	26.9	27.3	28	28.1	28.5	26.9	26.9	27.5	28	28	29.2	27	27.2	27.4	28	28.5	29
	35	26	27.5	27.7	28.1	28.5	29	27.7	28	28.5	28.5	29.6	30	26.9	27.1	27.8	28.6	29.3	29.7	26.2	26.5	27.7	28.7	29	30.3	25.8	27.7	28.5	28.7	28.7	30.6
	42	28	28.4	28.8	29.1	30.1	30.6	29.9	30	30.1	31.2	31.4	32.2	28.4	28.6	28.8	29.4	30	30.5	26.7	27.6	27.6	29.1	30.3	30.9	27.5	27.7	29.2	30.3	30.5	30.6
	49	29	30	30	31.5	31.6	32.8	31.3	31.9	32.5	33.1	35.3	35.7	27.5	28.6	29.3	29.4	29.7	31	27.6	28.7	29	29	30	32.1	25.9	28.2	28.2	30	30.4	31.2
	56	29.4	30	30.7	31.9	32.2	32.6	31.6	32	33.5	34	37.4	37.6	28.3	28.9	29.4	30.5	31.2	31.5	29.1	29.6	29.9	30	30	30.6	26.5	28.7	28.8	30.8	31.2	32.6
	63	31.3	31.6	31.6	32.6	33.2	33.2	32.8	33.2	34.4	35.6	38.2	38.5	28.9	29.9	29.8	30.8	31.3	31.5	29	30.5	30.6	30.6	30.9	31	28.3	29.3	29.8	31.2	31.5	31.7
Serum triglyceridel	HFX	1.266	0.86	1.046	1.348	1.22	1.429
	HFS	1.406	1.545	1.278	1.65	1.731	1.522
	HSL	1.08	0.802	0.755	0.581	0.871	0.767
	HSB	0.79	0.674	0.929	0.802	1.104	0.744
	ASA	0.848	0.883	0.72	0.79	0.918	1.104
Lipid tolerance	Time/h	HFX						HFS						HSL						HSB						ASA
	0	1.266	0.86	1.046	1.348	1.21992	1.42905	1.406	1.545	1.278	1.65	1.731	1.522	1.08	0.802	0.755	0.581	0.871	0.767	0.79	0.674	0.929	0.802	1.104	0.744	0.848	0.883	0.72	0.79	0.918	1.104
	1	1.58	1.22	1.499	1.568	1.98672	1.70788	2.115	2.417	1.58	2.126	2.219	2.022	1.15	1.278	1.069	1.22	0.86	1.359	1.104	0.999	1.139	1.266	1.29	0.802	1.069	1.08	0.744	1.22	1.324	1.278
	2	2.219	2.719	2.266	2.417	2.37	2.115	2.44	3.09	2.719	2.707	3.056	3.485	1.487	2.231	1.557	1.452	1.998	1.72	1.452	2.219	1.557	1.975	1.464	1.72	1.534	1.661	1.905	2.184	1.406	1.58
	3	2.138	2.823	2.3	2.486	2.55602	2.35851	2.614	2.951	2.777	2.626	3.16	3.346	1.743	2.324	1.998	1.545	1.952	1.871	1.534	2.033	1.859	2.3	1.72	1.882	1.917	1.952	1.882	2.312	1.743	1.557
	4	1.998	2.73	2.184	2.359	2.62573	2.07967	2.626	2.37	2.998	2.812	3.009	3.346	1.603	2.08	1.754	1.65	1.743	1.348	1.185	1.871	1.789	2.022	1.627	1.894	1.766	1.812	1.673	2.056	1.232	1.522
Lipid tolerance (AUC)	HFS			HSL			HSB			ASA
	10.1	10.1	0.432	6	6.055	0.3459	6	6.005	0.356	6	6.002	0.3438	6
Ileal RT-qPCR		HFX						HFS						HSL						HSB						ASA
	Pparα	0.855459	1.14454	0.899831	0.899831	1.16146	0.838536	2.36981	1.33309	2.34197	1.14689	1.71231	2.74336	0.621907	0.221407	0.107897	0.527676	0.131756	0.372663	0.613345	0.552777	0.128312	0.577433	0.14418	0.359969	0.533947	0.357192	0.251342	0.672556	0.0794364	0.304802
	Cd36	0.804983	1.19502	0.858854	1.14115	1.14115	0.858854	1.79879	2.56157	2.92915	3.18321	5.02974	1.97313	0.413807	0.273011	0.486491	0.0954232	0.138743	0.250084	0.317985	0.2565	0.381693	0.346394	0.161598	0.50715	0.164599	0.282639	0.466673	0.264343	0.341625	0.136833
IF PPARA	HFX	0.99	1.21	1.3	1.15	1.11	0.78	0.78	0.92	0.78
	HFS	1.61	1.4	1.09	0.98	0.88	1.35	1.5	1.56	1.24
	HSL	0.78	0.98	0.65	0.82	1.06	0.51	1	0.62	0.66
	HSB	0.89	0.99	0.41	0.5	0.55	0.46	0.51	0.66	0.4
	ASA	0.78	0.3	0.74	0.44	0.51	0.55	0.4	0.45	0.54
IF CD36	HFX	1.09	0.76	1.22	0.69	0.75	0.92	1.05	1.43	1.08
	HFS	1.36	1.46	1.71	1.87	1.22	1.33	1.48	1.66	1.33
	HSL	0.61	0.41	0.85	1.04	0.46	0.94	0.77	0.6	0.67
	HSB	0.52	0.36	0.6	0.91	0.54	0.7	0.61	0.56	0.59
	ASA	0.42	0.28	0.56	0.41	0.59	0.55	0.39	0.52	0.39
Ileal RT-qPCR		HFX						HFS						HSL						HSB						ASA
	Hif-1α	0.941151	1.05885	0.875877	1.12412	0.941151	1.05885	0.753927	0.167531	0.241283	0.701639	0.436029	0.802458	2.34973	1.97588	1.3744	1.72764	1.22476	1.79315	1.55025	3.05781	2.04033	3.31452	3.7386	1.29459	1.46662	1.92185	1.99834	3.62706	1.53954	1.2163
	Hif-2α	0.889549	1.11045	0.739298	1.2607	1.0692	0.930796	0.966704	0.769048	0.982294	0.749618	0.512824	0.44644	1.47544	2.69661	2.06226	1.50966	1.254	0.777297	1.10278	3.29698	1.33258	2.25672	1.18636	1.5983	1.29338	3.7093	1.62927	2.5566	1.31634	1.73693
Hypoxia score	HFX	0.94	0.74	1.34	0.98	1.17	0.97	0.74	1.03	1.09
	HFS	0.93	0.54	0.62	0.83	0.79	0.7	0.65	1.07	0.63
	HSL	1.19	1.21	1.39	1.56	1.32	1.21	0.93	1.21	1.4
	HSB	1.83	1.65	1.3	1.25	1.32	1.46	1.63	1.54	1.21
	ASA	1.46	1.73	2.1	2.03	1.83	1.35	1.53	1.83	1.94
Staphylococcus xylosus	HFX	0.0174073	0.00232407	0.0128986	0.0153853	0.00678628	0.00378823
	HFS	0.0734405	0.0824812	0.115553	0.0595659	0.0628893	0.056103
	HSL	4.65e-05	4.65e-05	0.00016268	0	0.00037185	2.32e-05
	HSB	0.00020917	0.00079018	0	2.32e-05	0.00041833	0.00120852
	ASA	0.00306777	0.0033699	4.65e-05	0	0	0.00023241
Lactobacillus reuteri	HFX	9.3e-05	4.65e-05	0.0027424	0.00034861	0	0.00037185
	HFS	0	2.32e-05	0.00162685	0	4.65e-05	2.32e-05
	HSL	0.0646091	0.0856419	0.152017	0.0667937	0.0430882	0.119899
	HSB	0.128126	0.169425	0.0480385	0.0153853	0.203217	0.165264
	ASA	0.00290509	0.0048573	0.0727666	0.0714186	0.0653296	0.0283536

## Sheet: Fig.6
GC-MS		Con			S-H			S-A			E-A
	C8:0	0.0012	0.0023	0.0007	0.0123	0.0042	0.0032	0.002	0.0015	0.0018	0.02	0.0161	0.0505
	C10:0	0.032	0.0555	0.0283	0.1481	0.0835	0.0565	0.0501	0.0574	0.0486	0.1812	0.136	0.3093
	C11:0	0.0025	0.0033	0.0039	0.0061	0.0079	0.0059	0.0033	0.0039	0.0031	0.0122	0.0083	0.0192
	C12:0	0.2488	0.7209	0.2546	0.7119	0.8933	0.6434	1.2968	1.6018	1.2753	2.5601	1.7844	2.6853
	C13:0	0.0077	0.0151	0.0081	0.0132	0.0126	0.0152	0.0104	0.0117	0.0108	0.0157	0.0122	0.02
	C14:0	1.406	5.4967	1.4416	4.1799	3.3305	3.8548	3.7499	3.6134	3.6581	4.0009	3.0252	4.4524
	C14:1	0.1401	0.0781	0.1327	0.0552	0.1133	0.082	0.15	0.0788	0.1172	0.1525	0.0897	0.2002
	C15:0	0.074	0.1836	0.0777	0.1237	0.1156	0.1313	0.1174	0.1214	0.1139	0.1377	0.1091	0.1834
	C16:0	25.112	80.8637	28.1143	64.5592	57.1238	67.6977	58.9263	57.7209	58.9992	67.9109	50.1062	68.6308
	C16:1	0.7043	3.9548	0.9683	2.9923	2.3151	2.6273	2.6632	2.5581	2.6896	2.847	2.1146	2.8737
	C17:0	0.1845	0.7442	0.1905	0.5418	0.4226	0.5012	0.5189	0.4679	0.5028	0.4757	0.3959	0.4278
	C18:0	14.5999	49.4572	17.0318	38.2071	32.9738	39.4939	35.448	34.6816	35.4249	39.277	30.4074	31.5084
	C18:1n9	1.1947	1.136	0.4816	0.9522	0.9138	3.4166	0.92	0.8541	0.9385	0.9762	0.9283	1.1018
	C18:1n9c	28.1115	88.9633	38.3613	73.9691	69.1757	80.5203	66.5203	64.6294	66.5475	85.4079	56.6732	58.459
	C18:2n6c	11.6053	55.1845	15.1875	43.8025	32.1053	37.3069	38.1716	36.5747	38.1353	40.1421	29.1375	30.7814
	C20:0	0.1384	0.611	0.1963	0.4472	0.3824	0.4177	0.4417	0.4114	0.4162	0.4422	0.3712	0.3698
	C18:3n6	0.105	0.1823	0.0673	0.1644	0.0858	0.1011	0.1295	0.0985	0.1313	0.0993	0.1072	0.1221
	C20:1	0.2908	1.412	0.4253	0.9605	0.7965	0.8773	0.9325	0.9359	0.9747	1.0861	0.7982	0.81
	C18:3n3	0.7914	4.7497	1.1122	3.4662	2.1352	2.4914	3.101	2.9636	3.1052	2.8435	2.1772	2.4774
	C20:2	0.2353	1.4474	0.3661	0.9095	0.5835	0.6954	0.8888	0.7393	0.8958	0.8714	0.6088	0.6474
	C22:0	0.0482	0.1224	0.083	0.0884	0.075	0.0866	0.0903	0.0815	0.0636	0.1074	0.1133	0.1049
	C20:3n6	0.0497	0.1612	0.1678	0.1021	0.0749	0.0734	0.0881	0.0829	0.0908	0.088	0.0698	0.1034
	C22:1n9	1.421	1.638	2.9034	2.9594	1.9823	2.3607	1.597	1.511	1.554	2.0505	2.0482	1.6855
	C20:3n3	0.0844	0.2169	0.0403	0.1702	0.1006	0.1146	0.1731	0.1348	0.1519	0.133	0.1145	0.1021
	C23:0	0.0291	0.0428	0.0359	0.0276	0.0463	0.0334	0.0293	0.0224	0.0415	0.0369	0.0334	0.0256
	C20:4n6	0.1284	0.5908	0.1343	0.3525	0.2632	0.2935	0.3833	0.3516	0.3676	0.3327	0.2737	0.3006
	C24:0	0.0204	0.0318	0.0189	0.0267	0.0195	0.0243	0.0156	0.0248	0.0182	0.0294	0.0323	0.0224
GC-DA	Con	0.2488	0.7209	0.2546
	S-H	0.7119	0.8933	0.6434
	S-A	1.6018	1.2753	1.2968
	E-A	2.5601	1.7844	2.6853
Bacterial substrate specificity		S.xylosus				E.coli
	C2	0.98	1.51	0.67	0.4	0.96	0.31	0.27	0.44
	C4	1.02	1.22	0.76	0.4	1.13	0.51	0.36	0.22
	C8	0.89	1.2	0.73	0.6	1	0.38	0.33	0.27
	C10	1.11	1.24	0.87	0.62	1.16	0.36	0.62	0.31
	C12	0.16	1.02	0.24	0.62	1.36	0.6	0.2	0.11
	C14	0.13	0.82	0.33	0.38	1.29	0.29	0.36	0.02
	C16	0.11	0.84	0.31	0.67	1.13	0.64	0.22	0.02
	C18	0.11	0.71	0.38	0.6	1.02	0.64	0.11	0.02
Substrate specificity of recombinant E. coli		E. coli BL21(DE3)/pET-28a(+)					E. coli BL21(DE3)/ACOT1312					E. coli BL21(DE3)/ACOT2244					E. coli BL21(DE3)/TesA945127
	C2	1	1.1	0.87	1.05	0.9	0.75	1.03	1.25	1	0.85	1.1	1.05	0.78	1.08	1	2.98	3.33	3.2	3	2.88
	C4	1.6	1.8	2.2	1.98	1.88	1.38	1.63	1.35	1.7	1.65	1.75	1.43	1.6	1.43	1.48	7.38	6.88	6.88	6.1	7.78
	C8	1.63	1.88	1.58	1.35	1.68	1.55	2	1.6	1.58	1.93	0.88	0.93	0.95	0.9	0.98	2.05	1.8	2.03	2.1	2.03
	C10	0.33	0.4	0.43	0.43	0.48	0.5	0.53	0.53	0.68	0.43	0.83	1.1	0.9	1.03	0.75	1	0.78	0.73	0.73	0.8
	C12	0.78	0.65	0.6	0.85	0.88	1.05	1.1	1.23	1.2	0.93	5.35	5.2	6.05	4.7	4.88	2.45	2.35	2.88	2.65	2.65
	C14	0.08	0.28	0.1	0.23	0.2	2.25	2.28	2.53	2.43	2.33	1	0.68	1.05	0.8	0.88	0.2	0.3	0.3	0.05	0.15
	C16	0.13	0.15	0.18	0.25	0.23	0.15	0.2	0.23	0.23	0.13	0.1	0.15	0.15	0.18	0.2	0.25	0.48	0.28	0.3	0.35
	C18	0.28	0.38	0.2	0.43	0.5	0.43	0.4	0.48	0.4	0.58	0.5	0.53	0.5	0.48	0.48	0.48	0.48	0.45	0.5	0.58
The recombinant E. coli was specific for C12	Control	2.214	1.857	1.714	2.429	2.5
	ACOT1312	3	3.143	3.5	3.429	2.643
	ACOT2244	15.29	14.86	17.29	13.43	13.93
	TesA945127	7	6.714	8.214	7.571	7.571
AVN B-S.xylosus		AVN B 0								AVN B 0.5								AVN B 1								AVN B 1.5								AVN B 2								AVN B 2.5
	0	0	0	0	0	0	0	0	0	0	0	0	0	0	0	0	0	0	0	0	0	0	0	0	0	0	0	0	0	0	0	0	0	0	0	0	0	0	0	0	0	0	0	0	0	0	0	0	0
	2	0	0	0	0	0	0	0	0	0	0	0	0	0	0	0	0	0	0	0	0	0	0	0	0	0	0	0	0	0	0	0	0	0	0	0	0	0	0	0	0	0	0	0	0	0	0	0	0
	4	0.088	0.066	0.072	0.068	0.095	0.082	0.073	0.075	0.052	0.053	0.045	0.038	0.037	0.035	0.043	0.048	0.053	0.051	0.018	0.026	0.022	0.025	0.034	0.037	0.053	0.102	0.036	0.033	0.031	0.028	0.05	0.014	0.043	0.052	0.004	0.004	0.179	0.033	0.044	0.074	0.04	0.143	0.099	0.073	0.092	0.097	0.091	0.056
	6	0.295	0.244	0.282	0.256	0.46	0.3	0.237	0.264	0.104	0.101	0.076	0.064	0.068	0.048	0.088	0.111	0.095	0.098	0.028	0.033	0.038	0.067	0.075	0.097	0.096	0.055	-0.032	0.02	0.04	-0.006	0.089	0.073	0.09	0.031	-0.002	-0.013	0.019	-0.019	0.007	0.015	0.069	0.087	0.062	0.02	0.034	0.04	0.055	0.097
	8	0.616	0.618	0.651	0.59	0.798	0.692	0.518	0.543	0.275	0.309	0.248	0.222	0.244	0.253	0.338	0.266	0.26	0.267	0.114	0.211	0.163	0.227	0.25	0.277	0.278	0.293	0.096	0.2	0.238	0.196	0.242	0.312	0.174	0.174	0.163	0.097	0.609	0.106	0.144	0.188	0.128	0.23	0.151	0.152	0.128	0.191	0.227	0.413
	10	0.76	0.752	0.719	0.734	0.852	0.87	0.709	0.712	0.549	0.547	0.543	0.533	0.517	0.495	0.509	0.419	0.541	0.565	0.397	0.591	0.453	0.518	0.492	0.529	0.48	0.386	0.365	0.478	0.453	0.416	0.354	0.455	0.357	0.435	0.328	0.239	0.386	0.349	0.162	0.235	0.137	0.302	0.174	0.308	0.28	0.356	0.275	0.271
	12	0.782	0.779	0.946	0.746	0.871	0.879	0.741	0.74	0.742	0.741	0.742	0.681	0.577	0.641	0.61	0.526	0.646	0.65	0.679	0.654	0.624	0.611	0.522	0.571	0.59	0.73	0.616	0.637	0.646	0.577	0.573	0.526	0.394	0.462	0.407	0.308	0.383	0.393	0.212	0.381	0.186	0.327	0.21	0.321	0.394	0.382	0.32	0.357
	14	0.881	0.878	1.038	0.822	0.948	0.983	0.867	0.862	0.743	0.731	0.74	0.665	0.776	0.632	0.607	0.547	0.666	0.738	0.688	0.655	0.593	0.609	0.537	0.593	0.578	0.647	0.627	0.68	0.657	0.586	0.483	0.576	0.46	0.502	0.477	0.381	0.362	0.43	0.266	0.484	0.212	0.354	0.252	0.373	0.475	0.429	0.384	0.47
	16	0.891	0.884	1.035	0.822	0.941	0.991	0.883	0.858	0.763	0.756	0.728	0.659	0.794	0.631	0.615	0.586	0.64	0.74	0.715	0.721	0.533	0.598	0.647	0.607	0.563	0.602	0.641	0.587	0.645	0.599	0.485	0.535	0.512	0.564	0.53	0.425	0.354	0.479	0.436	0.628	0.342	0.432	0.328	0.436	0.443	0.463	0.428	0.422
	18	0.9	0.883	1.039	0.831	0.951	0.998	0.88	0.859	0.754	0.731	0.727	0.654	0.694	0.627	0.605	0.578	0.641	0.622	0.691	0.712	0.533	0.688	0.637	0.594	0.552	0.554	0.606	0.672	0.536	0.56	0.473	0.518	0.469	0.518	0.502	0.385	0.435	0.448	0.364	0.49	0.278	0.382	0.285	0.399	0.408	0.439	0.405	0.408
	20	0.901	0.883	1.037	0.828	0.946	0.901	0.878	0.851	0.787	0.772	0.732	0.66	0.691	0.634	0.698	0.672	0.639	0.649	0.525	0.621	0.534	0.608	0.66	0.619	0.567	0.54	0.578	0.598	0.554	0.609	0.402	0.545	0.561	0.508	0.49	0.474	0.477	0.517	0.531	0.451	0.415	0.39	0.376	0.385	0.378	0.491	0.465	0.443
	22	0.946	1.008	0.984	0.878	1.045	1.041	0.929	0.885	0.746	0.789	0.733	0.687	0.701	0.649	0.744	0.695	0.704	0.642	0.593	0.68	0.595	0.609	0.65	0.701	0.603	0.579	0.639	0.499	0.52	0.557	0.435	0.557	0.524	0.49	0.47	0.526	0.408	0.542	0.582	0.479	0.422	0.482	0.452	0.363	0.338	0.452	0.429	0.452
	24	0.939	1.091	1.095	0.974	1.083	0.959	0.795	0.782	0.779	0.758	0.632	0.805	0.722	0.539	0.703	0.687	0.689	0.585	0.609	0.716	0.54	0.609	0.668	0.645	0.568	0.586	0.595	0.609	0.688	0.561	0.452	0.671	0.498	0.447	0.41	0.481	0.42	0.485	0.565	0.591	0.418	0.46	0.457	0.429	0.493	0.492	0.543	0.46
AVN B-S.xylosus-IC50	AVNB(mg/mL)	S.xylosus (lg CFU)
	0.5	7.54	7.61	7.53	7.39
	1	6.87	7.26	7.48	7.06
	1.5	6.75	6.66	6.8	5.94
	2	5.93	5.52	5.61	5.87
	2.5	4.66	5.5	5.1	5.38
	5	4.5	3.96	4.76	4.67
[truncated: 8 more columns]

## Sheet: Extended Data Fig.1
Fat index	Control	0.016	0.024	0.015	0.017	0.018	0.018
	HFD	0.081	0.077	0.093	0.078	0.071	0.073
	AVN B	0.028	0.033	0.028	0.028	0.031	0.035
Fecal total cholesterol	Control	0.139	0.154	0.164	0.189	0.199	0.209
	HFD	0.179	0.184	0.219	0.229	0.234	0.239
	AVN B	0.249	0.264	0.279	0.294	0.294	0.304
Fecal triglyceridel	Control	0.168	0.174	0.178	0.182	0.195	0.197
	HFD	0.162	0.162	0.162	0.166	0.166	0.166
	AVN B	0.231	0.233	0.241	0.249	0.253	0.257
Length of small intestine	Control	32	32	32	31	32	33
	HFD	35	34	36	37	34	33
	AVN B	31	29	32	30	29	28
SI villi length	Control	216.67	208.33	216.67	183.33	166.67	216.67	230	233.33
	HFD	266.67	275	250	266.67	266.67	283.33	283.33	258.33
	AVN B	166.67	186.67	191.67	183.33	190	208.33	193.33	206.67
Lactobacillus_reuteri	Control	0.0004527	0	5.03e-05	0	0	5.03e-05
	HFD	0.00256533	0.00077966	0.0002515	0.0135812	0.00653907	0.00412464
	AVNB	0.027112	0.0131536	0.00671512	0.0164734	0.0002012	0.0170267
Lactobacillus_johnsonii	Control	0.00128266	0	5.03e-05	2.52e-05	5.03e-05	0.00037725
	HFD	0.00309348	0.00060361	2.52e-05	0.00543246	0.00326954	0.00145872
	AVNB	0.0121224	0.00759538	0.00103116	0.0148135	0	0.0269359
IF Ileal HMGCS2	Control	0.83	1.21	0.62	0.99	1.38	1.24	0.58	0.94	1.21
	HFD	1.96	2.09	2.29	2.47	2.61	2.66	3.01	3.72	3.76
	AVN B	1	1.09	1.11	1.21	1.24	1.25	1.35	1.46	1.64
Ileal RT-qPCR		Control						HFD						AVN B
	Ffar1	0.914	0.957	1.086	1.14	1.195	1.257	0.469	0.577	0.683	0.691	0.783	1.125	0.376	0.542	0.565	0.597	0.649	0.672
	Ffar2	0.914	0.986	1.007	1.014	1.021	1.054	1.558	1.753	2.26	2.281	2.292	2.584	0.593	0.616	0.747	0.895	0.984	1.084
	Ffar3	0.727	0.979	1.02	1.021	1.125	1.206	0.651	0.66	0.668	0.789	0.926	1.006	0.59	0.599	0.603	0.784	0.985	1.148
	Ffar4	0.849	0.897	0.903	0.967	0.967	1.097	2.224	2.605	3.145	3.514	3.948	4.202	0.807	0.982	1.082	1.11	1.159	1.166
Ileal TNF-α	Control	334.8	382.8	394.8	370.8	298.8	426.8
	HFD	690.8	714.8	850.8	786.8	826.8	750.8
	AVN B	490.8	446.8	382.8	462.8	510.8	418.8
Ileal IL-6 RT-qPCR		Control						HFD						AVN B
	IL-6	0.929	1.071	1.233	0.767	1.095	0.905	2.747	3.389	5.588	3.081	1.95	2.879	0.909	0.775	1.407	0.583	1.72	0.956
Ileal T-SOD	Control	2.823	2.7	2.44	2.789	2.858	2.52
	HFD	1.439	1.729	2.024	1.879	1.781	1.583
	AVN B	2.178	2.541	2.391	2.143	2.04	2.603
Ileal MDA	Control	1	1.45	0.98	2.07	0.76	1.54
	HFD	2.42	2.07	2.41	2.64	2.77	2.13
	AVN B	1.27	1.66	1.95	0.52	1.32	1.42

## Sheet: Extended Data Fig.2
Energy intake		HFD			ACT			AAB			INB			IAB
	0
	7	79.3	82.6	73.1	79.1	79.1	79.1	78.3	84.4	79.6	80.7	79.6	74.1	77.6	79.1	81
	14	81	80.9	74.7	85.1	81.6	73.1	78.4	73.9	81.6	78.3	74.8	77.3	76.9	79.3	78.3
	21	81.2	79.5	80.4	87	84.9	81	85.8	78.9	85.1	82.8	77	79.9	74.8	82.1	82.5
	28	85.2	83.3	91.4	91	86.5	90.4	84.9	83	90.1	86.5	83.7	90.7	83.7	84	87
Serum total cholesterol	HFD	3.174	3.367	3.463	3.775	3.799	3.847
	ACT	4.088	4.497	5.362	5.675	5.939	6.108
	AAB	2.501	2.621	2.741	2.91	3.078	3.246
	INB	2.212	2.453	2.741	3.078	3.078	3.126
	IAB	2.284	2.381	2.597	2.958	2.982	3.174
Serum high density lipoprotein cholesterol	HFD	1.935	2.003	2.115	2.25	2.273	2.385
	ACT	1.755	1.8	1.845	2.048	2.093	2.138
	AAB	2.655	2.7	2.745	2.903	3.06	2.7
	INB	2.858	2.97	3.06	3.105	3.128	3.488
	IAB	2.835	2.858	3.083	3.128	3.465	3.578
Serum low density lipoprotein cholesterol	HFD	2.742	2.785	2.855	2.981	3.066	4.177
	ACT	3.094	3.221	3.474	3.825	3.994	4.036
	AAB	2.124	2.152	2.236	2.503	2.503	2.728
	INB	1.955	1.969	2.335	2.377	2.391	2.672
	IAB	1.688	1.997	2.138	2.208	2.25	2.447
Epididymal fat weight	HFD	0.7	0.9	0.7	1	0.8	0.9
	ACT	0.9	1	1	0.9	1.3	1.3
	AAB	0.5	0.4	0.4	0.5	0.5	0.6
	INB	0.5	0.5	0.4	0.3	0.5	0.4
	IAB	0.3	0.6	0.4	0.5	0.5	0.5
Liver weight	HFD	1	0.9	0.8	0.9	0.9	0.9
	ACT	1.2	1.1	1	0.9	1	0.9
	AAB	0.9	0.7	0.6	0.9	0.8	0.8
	INB	0.9	0.6	0.9	0.5	0.7	0.7
	IAB	0.7	0.7	0.8	0.7	0.6	0.6
Hepatic total cholesterol	HFD	0.384	0.401	0.409	0.424	0.43	0.433
	ACT	0.449	0.475	0.477	0.483	0.506	0.508
	AAB	0.281	0.302	0.317	0.342	0.346	0.349
	INB	0.346	0.355	0.363	0.365	0.38	0.393
	IAB	0.246	0.254	0.288	0.279	0.346	0.357
Hepatic high density lipoprotein cholesterol	HFD	0.039	0.045	0.047	0.051	0.053	0.065
	ACT	0.03	0.031	0.041	0.044	0.048	0.049
	AAB	0.076	0.077	0.08	0.082	0.083	0.089
	INB	0.063	0.067	0.069	0.073	0.075	0.095
	IAB	0.079	0.09	0.091	0.098	0.099	0.102
Hepatic low density lipoprotein cholesterol	HFD	0.055	0.062	0.065	0.069	0.07	0.071
	ACT	0.075	0.075	0.077	0.077	0.08	0.08
	AAB	0.047	0.051	0.052	0.062	0.062	0.064
	INB	0.043	0.048	0.055	0.056	0.057	0.059
	IAB	0.047	0.047	0.048	0.051	0.054	0.061
Fecal total cholesterol	HFD	0.121	0.279	0.302	0.347	0.37	0.43
	ACT	0.068	0.083	0.159	0.189	0.294	0.332
	AAB	0.423	0.423	0.468	0.529	0.483	0.597
	INB	0.31	0.408	0.476	0.604	0.612	0.664
	IAB	0.566	0.687	0.755	0.71	0.763	0.77
Fecal triglyceridel	HFD	0.157	0.16	0.17	0.167	0.182	0.202
	ACT	0.117	0.121	0.143	0.133	0.148	0.163
	AAB	0.184	0.204	0.206	0.228	0.237	0.25
	INB	0.177	0.184	0.185	0.194	0.238	0.265
	IAB	0.225	0.243	0.277	0.281	0.293	0.305
Hepatic RT-qPCR		HFD						ACT						AAB						INB						IAB
	Cd36	1.16484	0.835162	0.934246	1.06575	1.18834	0.81166	1.79021	0.993181	1.92102	1.43582	1.57893	0.817306	1.04256	1.18931	0.994384	0.642547	1.0935	0.82299	1.23982	0.812325	0.865661	0.703135	0.846128	1.08594	1.0211	0.901331	1.07317	0.669833	0.999271	0.650196
	Pparα	1.18499	0.815005	1.2314	0.768598	1.27998	0.720024	0.898058	1.16868	0.9933	0.812422	1.42022	1.01123	1.12887	1.53143	1.09452	0.9933	2.30716	1.26235	1.13672	1.54208	0.52862	0.92038	1.22784	1.1616	1.29673	1.3612	0.818073	0.784748	1.22784	1.44005
	Rxr	0.889549	1.11045	0.75552	1.24448	0.972281	1.02772	1.03609	0.987016	1.16114	0.776761	0.84642	1.32818	1.29338	1.42518	1.06109	1.27063	0.894681	1.09387	0.933774	0.642223	0.714766	1.02494	0.999616	0.789738	0.732625	1.02182	1.24448	0.458674	1.39421	0.864205
	Cpt1	1.09674	0.903263	0.778462	1.22154	0.835162	1.16484	0.723577	0.749094	0.881907	0.687151	1.08683	1.3288	1.3882	1.21691	1.53549	1.13974	1.15679	1.18931	0.922242	0.675121	0.971778	0.615017	1.10967	0.852711	1.05206	1.31332	1.25588	0.881907	1.15679	1.0211
Length of small intestine	HFD	33.5	34.5	35	33	33.5	32.5
	ACT	36	36	34.5	35.5	36.5	33.5
	AAB	32	31	30.5	31	33	31
	INB	31	31.5	32.5	31	32	33
	IAB	31	31	31	31.5	30.5	31.5
SI villi length	HFD	200	200	166.67	200	200	183.33	158.33	150
	ACT	216.67	200	208.33	250	216.67	233.33	250	233.33
	AAB	116.67	133.33	116.67	150	133.33	133.33	133.33	150
	INB	166.67	150	150	116.67	116.67	108.33	116.67	121.67
	IAB	133.33	116.67	100	83.33	93.33	96.67	125	100
		HFD						ACT						AAB						INB						IAB
Ileal RT-qPCR	Rxr	0.852067	1.14793	1.05194	0.948061	0.818354	1.18165	2.61904	1.66906	1.57249	1.41721	1.69443	1.415	0.543005	0.711551	0.634218	0.713533	0.56284	0.790478	0.469448	0.170641	0.266656	0.518728	0.558952	0.381776	0.472714	0.18803	0.490747	0.625487	0.633228	0.707498
	Cpt1	0.785063	1.21494	1.14115	0.858854	0.899831	1.10017	1.61427	3.03328	1.64773	2.29817	1.98306	1.59962	0.463577	0.582723	0.525034	0.466673	0.557764	0.338617	0.314445	0.483263	0.54733	0.447663	0.502685	0.343344	0.578697	0.517949	0.248356	0.539795	0.542511	0.164679
	Fatp4	0.639235	1.36077	1.12753	0.872466	0.825065	1.17493	1.54159	1.60705	0.872466	1.2952	1.75635	1.52899	0.552642	1.07506	0.608433	1.28625	0.7133	0.825065	1.78314	0.652667	1.38816	0.518771	0.718261	0.981174	1.34203	0.968899	0.349453	1.11975	0.460917	0.902864
	ApoA-IV	0.913573	1.08643	0.996534	1.00347	1.03118	0.968818	2.28088	1.56872	1.79625	1.74714	1.39891	2.53907	0.48619	0.870304	0.505223	0.837982	0.873148	0.337813	0.479496	0.220613	0.433767	0.337976	0.613144	0.296129	0.539461	0.414542	0.474668	0.690155	0.508492	0.247294
	Pparβ	0.875877	1.12412	1.11045	0.889549	1.07954	0.920456	1.13982	1.14774	0.779784	0.901967	1.02131	1.70577	0.479233	0.881969	0.637787	0.933774	1.36644	1.02131	0.900501	0.869827	1.08009	0.374009	1.18134	0.959544	0.736522	0.581883	0.693105	0.769048	1.24007	1.01426
	Srebp1c	0.825065	1.17493	0.630225	1.36977	0.875877	1.12412	2.48385	1.34965	1.93715	1.4783	1.85164	1.54628	0.638421	0.872109	0.854966	0.91633	0.590005	1.05614	1.25057	0.608184	0.935584	0.356986	0.654652	0.822906	0.99487	1.00876	0.243829	0.604552	0.706519	1.02016
	Fasn	1.05885	0.941151	1.16146	0.838536	1.12412	0.875877	1.84356	1.28565	1.58661	2.54197	1.48329	1.58975	0.915415	0.670123	1.15344	0.676398	0.440985	0.594109	0.540549	0.74872	0.399411	0.77161	0.978606	0.218969	0.872059	0.723215	0.943402	0.776977	0.840197	0.641179
	Scd1	1.13094	0.869058	1.23468	0.765321	0.941151	1.05885	1.30815	1.62172	2.17971	1.80768	2.36608	1.92185	0.542436	0.623095	0.584039	0.544928	0.579346	0.401229	0.557686	0.311548	0.508435	0.335442	0.587434	0.230445	0.565471	0.345684	0.511972	0.537425	0.674784	0.17586

## Sheet: Extended Data Fig.3
Energy intake		Control			HFD			L-DA			H-DA
	0
	7	91.3	87.9	85.9	74.1	91.2	99.8	93.3	76.2	95.4	84.1	75.7	93.8
	14	94.4	87.4	99.7	95.4	86.2	101.1	103.5	97.5	86.7	101.1	88.8	98
	21	100.4	95.8	107.1	111.1	95.4	101.9	116.6	111.9	94.6	98.5	101.9	111.1
	28	98.4	96.5	104	109	89.6	99.3	114.8	106.6	97.7	100.1	96.7	109.3
Fat index	Control	0.017	0.013	0.009	0.014	0.014	0.015
	HFD	0.027	0.028	0.027	0.037	0.029	0.037
	L-DA	0.045	0.043	0.036	0.047	0.042	0.041
	H-DA	0.015	0.018	0.015	0.01	0.018	0.015
Serum total cholesterol	Control	2.966	2.966	2.995	3.023	3.136	3.136
	HFD	3.842	3.899	4.012	4.294	4.379	4.379
	L-DA	5.876	6.272	5.905	7.148	6.583	5.622
	H-DA	3.079	3.588	3.644	3.842	4.125	4.04
Serum triglyceridel	Control	1.47	1.331	1.297	1.902	1.643	1.815
	CDA	1.487	1.677	1.418	1.573	1.781	1.643
Serum high density lipoprotein choleste	Control	0.89	0.89	0.951	0.956	0.961	1.022
	HFD	0.625	0.641	0.692	0.692	0.732	0.763
	L-DA	0.539	0.59	0.605	0.62	0.722	0.732
	H-DA	0.808	0.824	0.844	0.854	0.864	0.915
Serum low density lipoprotein cholesterol	Control	1.181	1.255	1.369	1.385	1.418	1.466
	HFD	1.752	1.923	2.118	2.175	2.249	2.297
	L-DA	2.428	2.493	2.558	2.623	2.68	2.9
	H-DA	1.768	1.792	1.792	1.841	1.874	1.882
Epididymal fat weight	Control	0.43	0.33	0.2	0.35	0.34	0.38
	HFD	0.72	0.76	0.75	1.06	0.83	1.01
	L-DA	1.5	1.4	1.1	1.5	1.3	1.3
	H-DA	0.38	0.45	0.39	0.27	0.43	0.39
Liver weight	Control	1.07	1.06	0.94	0.95	0.98	1.14
	HFD	0.99	1.01	1.22	1.17	1.1	0.96
	L-DA	1.2	1.2	1.1	1.3	1.2	1.2
	H-DA	1.14	1.1	1.09	1.11	0.92	1.13
Hepatic total cholesterol	Control	0.079	0.084	0.094	0.099	0.104	0.114
	HFD	0.133	0.14	0.15	0.16	0.165	0.173
	L-DA	0.173	0.178	0.185	0.195	0.207	0.214
	H-DA	0.098	0.106	0.114	0.121	0.126	0.119
Hepatic triglyceridel	Control	0.093	0.105	0.121	0.125	0.128	0.13
	HFD	0.218	0.222	0.224	0.243	0.255	0.266
	L-DA	0.27	0.276	0.3	0.328	0.34	0.343
	H-DA	0.177	0.189	0.196	0.212	0.213	0.217
Hepatic high density lipoprotein cholesterol	Control	0.047	0.048	0.048	0.05	0.05	0.051
	HFD	0.029	0.029	0.031	0.033	0.036	0.037
	L-DA	0.025	0.025	0.026	0.026	0.027	0.028
	H-DA	0.045	0.046	0.054	0.057	0.058	0.058
Hepatic low density lipoprotein cholesterol	Control	0.057	0.059	0.067	0.069	0.072	0.075
	HFD	0.094	0.095	0.096	0.097	0.101	0.104
	L-DA	0.122	0.123	0.125	0.133	0.133	0.14
	H-DA	0.088	0.091	0.091	0.093	0.093	0.094
Hepatic RT-qPCR		Control						HFD						L-DA						H-DA
	Srebp1c	0.927348	1.07265	1.15471	0.845294	0.795002	1.205	1.9201	1.81653	1.62172	2.39085	1.98485	1.73993	1.90684	1.46529	3.31159	2.94349	1.57902	1.89084	0.807303	0.712609	0.577353	1.12313	0.726498	1.16395
	Fasn	0.729634	1.27037	0.920456	1.07954	0.972281	1.02772	1.68792	1.53182	1.51616	2.53225	1.62388	1.55773	3.28352	2.33795	1.61375	2.84893	2.80781	1.80181	0.576441	0.982987	0.426442	1.00029	0.778865	0.628265
	Scd1	1.0623	0.937698	1.01386	0.986138	0.982673	1.01733	1.62135	1.22027	1.48438	0.789965	0.272586	1.35171	0.793991	0.810674	0.972561	1.48438	0.776352	1.68738	0.957401	1.1787	1.27444	1.44379	0.657373	1.52075
Length of small intestine	Control	32	30	30	32	32	33
	HFD	32	32	31	33	31	34
	L-DA	36.5	34	35	35.5	37	36
	H-DA	34	32.5	33	36	36	35.5
SI villi length	Control	216.67	195	183.33	216.67	216.67	183.33	183.33	200
	HFD	250	216.67	233.33	250	258.33	263.33	250	241.67
	L-DA	283.33	300	316.67	266.67	266.67	283.33	283.33	283.33
	H-DA	266.67	333.33	316.67	300	300	283.33	266.67	258.33
Fecal total cholesterol	Control	0.077	0.138	0.146	0.095	0.086	0.077
	HFD	0.095	0.121	0.086	0.121	0.164	0.052
	L-DA	0.06	0.069	0.06	0.077	0.043	0.026
	H-DA	0.172	0.146	0.207	0.189	0.275	0.207
Fecal triglyceridel	Control	0.159	0.18	0.136	0.136	0.182	0.165
	HFD	0.162	0.133	0.153	0.174	0.2	0.165
	L-DA	0.136	0.208	0.162	0.203	0.142	0.168
	H-DA	0.206	0.258	0.255	0.232	0.191	0.185
		Control						HFD						L-DA						H-DA
Ileal RT-qPCR	Rxr	1.2607	0.739298	1.11729	0.882707	0.736071	1.26393	1.36059	1.48888	1.63581	1.60215	1.58878	1.48238	2.41869	2.25672	1.91854	2.53153	1.63344	2.54544	3.08277	2.61032	2.7511	2.88787	3.24432	1.87633
	Cpt1	1.25747	0.742531	1.19502	0.804983	0.704132	1.29587	1.7297	1.52681	1.86223	1.24576	1.66315	1.77021	2.10019	2.71419	1.94131	2.67035	2.3358	3.06082	4.28865	2.60363	2.12436	2.12436	2.81653	2.73951
	Fatp4	1.21824	0.78176	0.941151	1.05885	0.713648	1.28635	0.798187	1.23525	1.3036	1.97588	0.9287	1.44722	1.37059	1.20147	1.01572	1.72011	1.32252	1.1121	1.65267	1.58535	2.28548	1.11149	1.24253	1.4273
	ApoA-IV	1.36077	0.639235	1.10017	0.899831	0.78176	1.21824	1.58493	1.50986	1.64459	1.47195	1.60748	1.51026	1.99228	2.50432	1.90227	2.11071	2.19588	1.60748	2.36923	3.23646	3.00575	1.99685	2.70344	2.25761
	Pparβ	1.27037	0.729634	0.852067	1.14793	0.739298	1.2607	1.21862	1.59687	1.83915	2.09803	1.7953	2.40199	1.73537	2.06372	1.61221	2.26426	1.61802	1.89767	1.78416	1.99342	2.08354	1.97115	2.43552	1.69846
	Srebp1c	1.06575	0.934246	1.25747	0.742531	0.828427	1.17157	1.7677	1.94784	1.51627	1.82833	1.51409	1.62276	2.66083	2.07322	1.84104	2.05697	2.05401	2.40902	2.67933	3.09915	1.87973	2.49757	2.37585	3.1133
	Fasn	1.35472	0.645279	0.713648	1.28635	0.672842	1.32716	1.57789	1.6449	1.81918	1.41744	1.50352	1.81295	2.14057	2.49319	1.76943	2.5727	2.12629	1.78799	2.90391	2.39163	2.41711	1.49826	2.08253	2.45946
	Scd1	1.01386	0.986138	1.12071	0.879291	0.862252	1.13775	1.55818	1.80233	1.78313	1.47878	1.52222	1.45013	2.08473	2.65712	2.18013	2.35285	1.81024	2.5958	2.12854	3.57976	1.93779	2.50431	2.43882	2.06506

## Sheet: Extended Data Fig.4
Energy intake		Control			CDA
	0
	7	65.6	64	64.3	64.8	67.5	63.5
	14	65.8	66.8	64.2	67.4	66.2	64.5
	21	69.4	67.7	64	66.8	65.7	63.6
	28	76.2	77.4	69.7	73.2	75.5	76.7
Fat index	Control	0.021	0.017	0.022	0.013	0.021	0.02
	CDA	0.021	0.024	0.017	0.017	0.022	0.021
Epididymal fat weight	Control	0.5	0.4	0.5	0.3	0.5	0.5
	CDA	0.5	0.6	0.4	0.4	0.5	0.5
Serum total cholesterol	Control	6.025	5.616	4.538	6.286	4.798	5.244
	CDA	6.249	7.104	4.575	4.724	5.654	4.575
Serum triglyceridel	Control	1.47	1.331	1.297	1.902	1.643	1.815
	CDA	1.487	1.677	1.418	1.573	1.781	1.643
Liver weight	Control	1	0.9	1.1	0.8	0.9	1.1
	CDA	1	0.9	0.9	0.8	0.9	0.8
Length of small intestine	Control	32	32.5	31	32	32	31
	CDA	35	34	34	34.5	35	36.5
	Control						CDA
Ileal RT-qPCR	Pparα	1.18165	0.818354	1.13435	0.865653	0.882707	1.11729	1.31112	1.53772	1.05107	2.3487	2.20382	1.20581
	Rxr	1.2314	0.768598	1.18834	0.81166	1.13775	0.862252	1.43426	0.966138	1.26483	1.86471	1.01831	2.22867
	Cpt1	0.869058	1.13094	1.16146	0.838536	1.00347	0.996534	1.30815	0.905963	1.36221	1.87377	1.41911	1.91188
	Cd36	1.18499	0.815005	0.788371	1.21163	0.707298	1.2927	1.49992	1.098	1.22854	2.45708	1.50565	1.85368
	Fatp4	0.707298	1.2927	1.08987	0.910134	0.818354	1.18165	1.20613	1.4146	0.989074	1.78281	2.02904	0.717374
	ApoA-IV	1.0554	0.944605	0.771881	1.22812	0.882707	1.11729	0.851326	1.36394	1.62051	1.15385	0.933038	1.37555
		Control						CDA
Hepatic RT-qPCR	Pparα	1.0933	0.906697	0.930796	1.0692	1.0761	0.923901	1.08575	1.20472	0.653626	1.02565	1.64241	0.832666
	Rxr	1.07265	0.927348	0.996534	1.00347	1.18165	0.818354	1.33902	0.960051	0.781865	1.02455	0.722364	0.940042
	Cd36	1.08299	0.917014	1.16821	0.831793	1.1036	0.896401	1.14474	1.2269	0.843404	1.2094	1.25025	0.940967
SI villi length	Control	183.33	150	166.67	183.33	133.33	200	166.67	150
	CDA	216.67	233.33	250	233.33	216.67	250	233.33	250
IF PPARA	Control	0.68	0.84	0.66	1.26	1.22	1.05	1.1	1.1	1.08
	CDA	1.3	0.94	1.13	1.03	1.22	1.2	1.6	1.49	1.5
IF CD36	Control	0.79	0.89	0.93	0.95	1	1.04	1.06	1.15	1.19
	CDA	1.02	1.03	1.11	1.14	1.22	1.35	1.04	1.46	1.3

[truncated: 4 more sheets: Extended Data Fig.5, Extended Data Fig.6a, Extended Data Fig.7a, Extended Data Fig.8]
